# Supplementary material for: Exploiting MYC-induced PARPness to target genomic instability in multiple myeloma
Source: PubMed Central journal article supplement — Haematologica. 2020 Feb 20;106(1):185–95. doi: 10.3324/haematol.2019.240713 (PMC7776341; doi:10.3324/haematol.2019.240713), 2020-02-20
Supplement: 2019_240713-Disclosures_Contributions.pdf [file 2019_240713-Disclosures_Contributions.pdf]

Haematologica  
HAEMATOL/2019/240713  
Version 3

Exploiting MYC-induced PARPness to target genomic instability in  
multiple myeloma

Daniele Caracciolo, Francesca Scionti, Giada Juli, Emanuela Altomare,  
Gaetanina Golino, Katia Todoerti, Katia Grillone, Caterina Riillo,  
Mariamena Arbitrio, Michelangelo Iannone, Eugenio Morelli, Nicola  
Amodio, Maria Teresa Di Martino, Marco Rossi, Antonino Neri,  
Pierosandro Tagliaferri, and Pierfrancesco Tassone

Disclosures: None

Contributions: DC, FS, GJ, EA, GG, KG, RC, MA, and EM performed experiments and analyzed the data; KT and AN performed microarray experiments and provided biological samples; MI performed IHC analysis; NA, MTDM, and MR provided critical evaluation of experimental data and of the manuscript. DC, PT, and PT conceived the study and wrote the manuscript.
